# Supplementary material
Source: PubMed Central journal article supplement (PMC4145128)
Supplement: supp_tpc.114.126854_tpc126854_SupplementalData.pdf [file supp_tpc.114.126854_tpc126854_SupplementalData.pdf]

**Supplemental Figure 1.** Transcriptomic evidence connecting *Arabidopsis* and maize *RidA* with *BCAT3* and Thr dehydratase.

**(A)** Expression profiles of *Arabidopsis* *RidA* (At3g20390), *BCAT3* (At3g49680), and Thr dehydratase *OMR1* (At3g10050) in various tissues and developmental stages. Expression data were exported from the CSB.DB *Arabidopsis* database.

**(B)** Expression profiles of maize *RidA* (GRMZM2G117642), *BCAT3* homologs (GRMZM2G071208, GRMZM2G055899), and Thr dehydratase homologs (GRMZM2G155323, GRMZM2G569855).

**(C)** ATTED co-expressed gene network linking *Arabidopsis* *RidA*, *BCAT3*, Thr dehydratase, and other genes of branched-chain amino acid biosynthesis (marked with a red dot). Black lines are co-expression links. Protein-protein interactions (orange lines) are also shown. The network was drawn using *RidA*, *BCAT3*, and Thr dehydratase as query genes.

**A**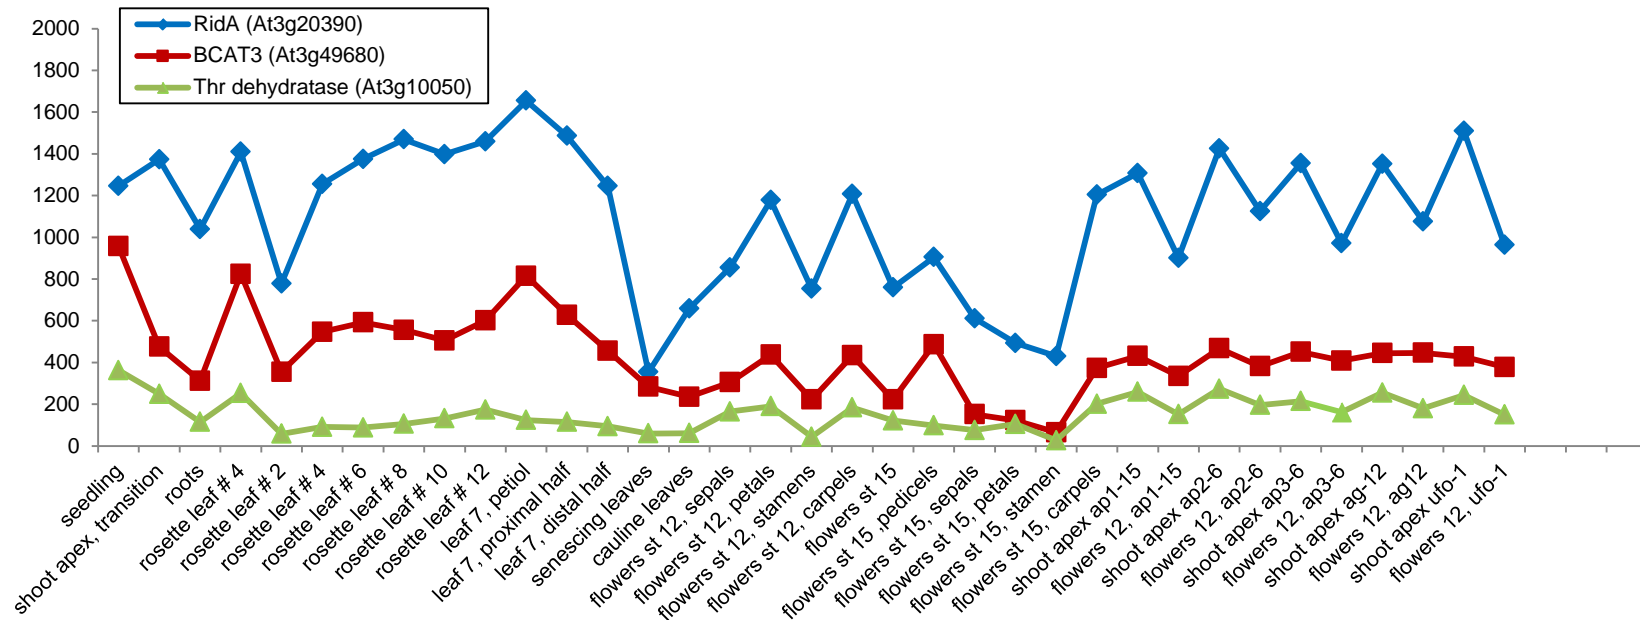

**B**

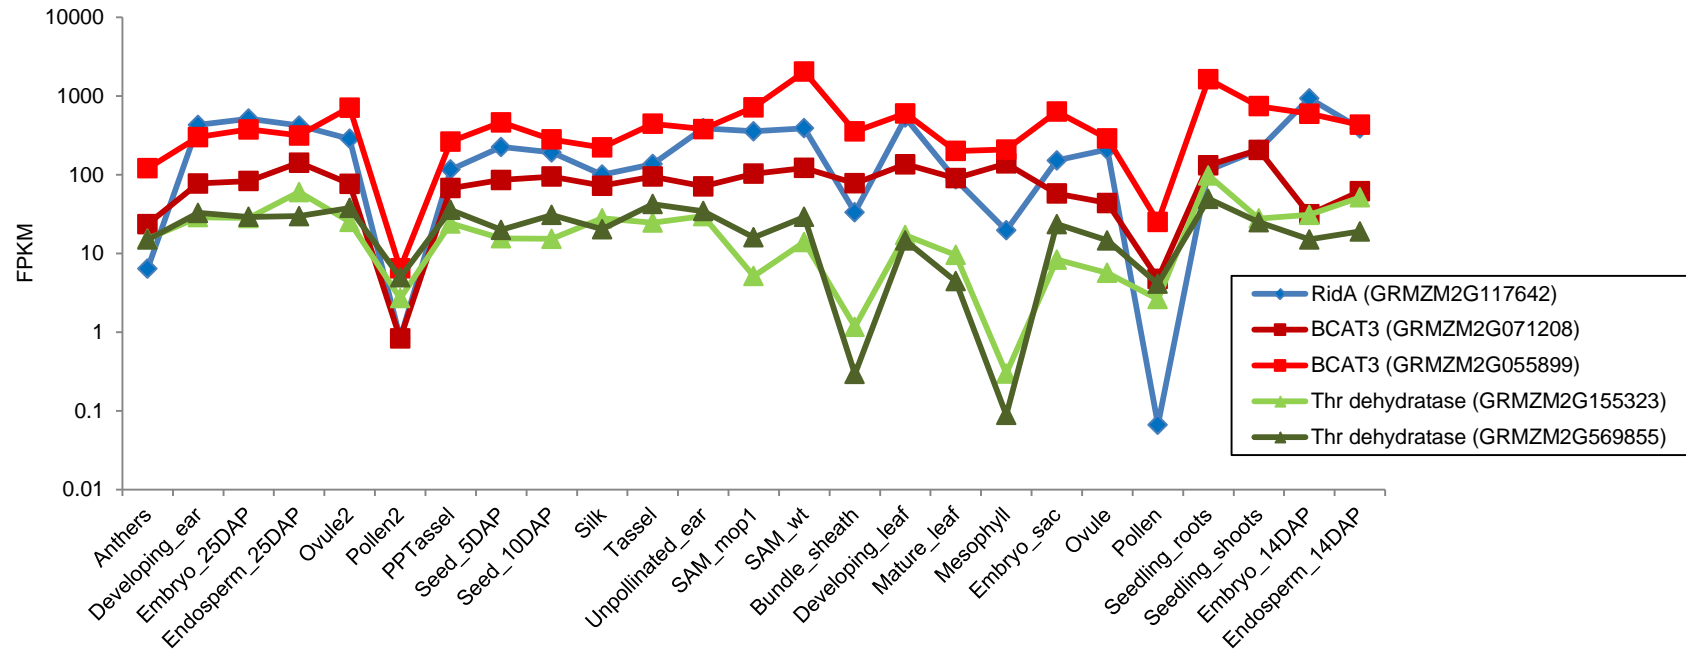

C

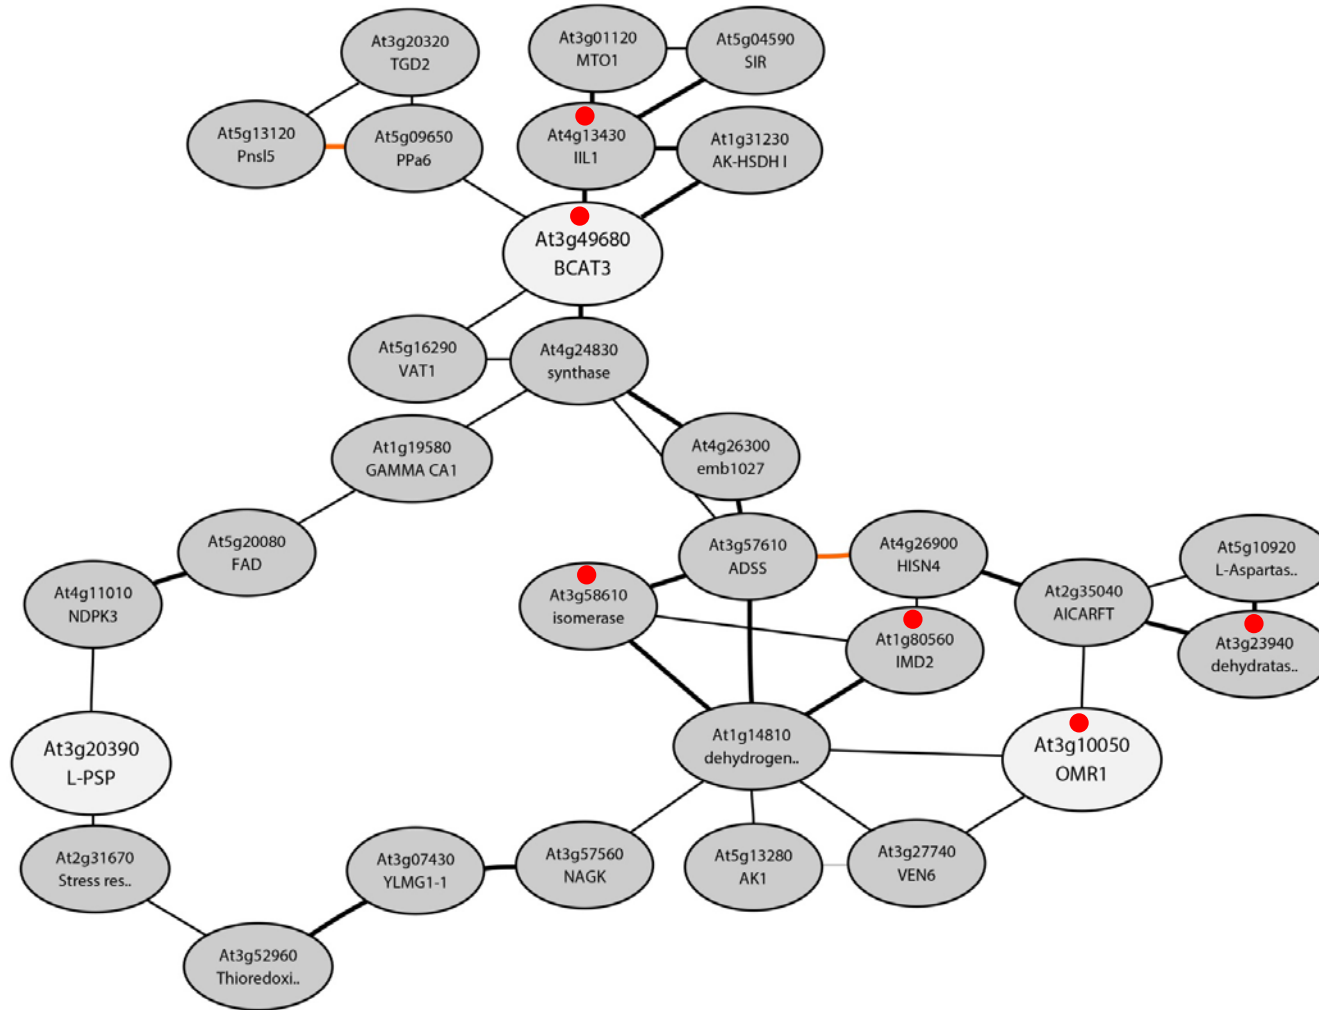

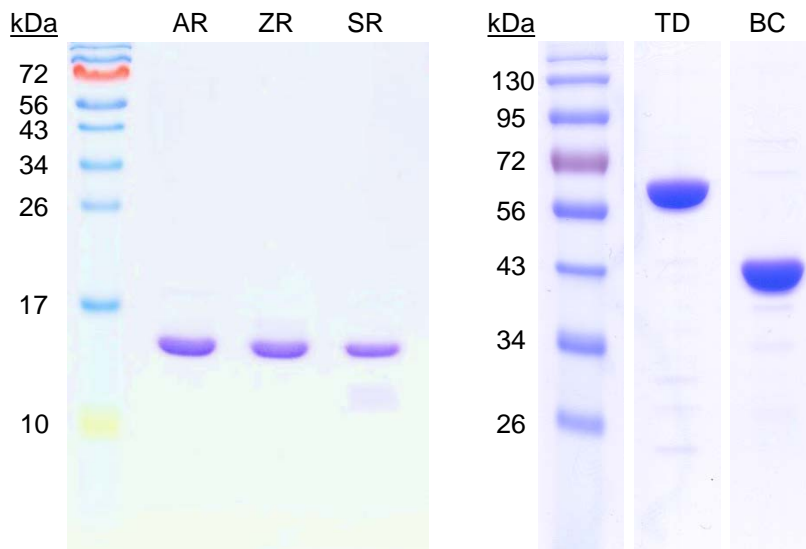

**Supplemental Figure 2.** Recombinant proteins used in this study were purified to near homogeneity. Two to five  $\mu\text{g}$  of  $\text{Ni}^{2+}$ -affinity purified *Arabidopsis* RidA (AR), maize RidA (ZR), *Salmonella* RidA (SR), *Arabidopsis* Thr dehydratase (TD), and *Arabidopsis* BCAT3 (BC) were analyzed by SDS-PAGE (RidA, 15% gel; Thr dehydratase and BCAT3, 10% gel) with Coomassie staining. Each protein preparation was judged to be  $\geq 90\%$  pure.

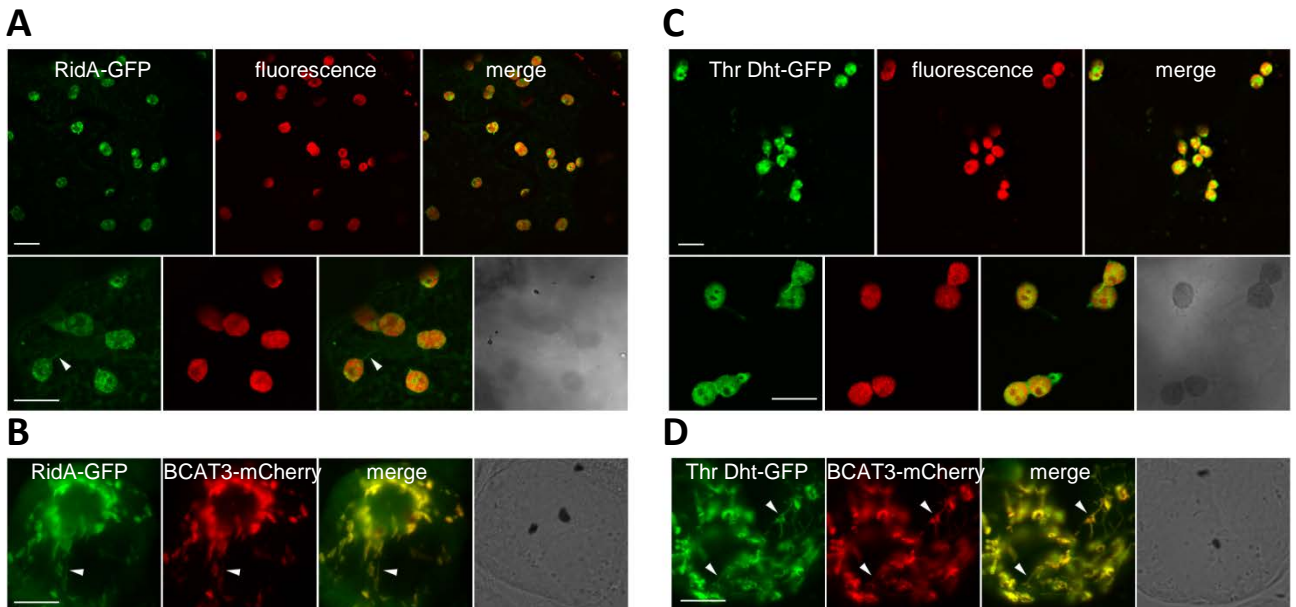

**Supplemental Figure 3.** *Arabidopsis* RidA and Thr dehydratase GFP fusions are targeted to chloroplasts in *N. benthamiana* leaf mesophyll cells and to leucoplasts in *N. tabacum* BY-2 cells.

(A) and (C) Representative micrographs of *N. benthamiana* mesophyll cells stably-expressing (via *Agrobacterium* transformation) *Arabidopsis* RidA-GFP or Thr dehydratase (Thr Dht)-GFP. GFP and chlorophyll fluorescence (as indicated by panel labels) were observed by confocal microscopy. The bottom row of images in A and C shows a portion of a RidA-GFP- or Thr Dht-GFP-transformed mesophyll cell at higher magnification. Arrowheads in A (bottom row) indicate examples of RidA-GFP localized to stromules. Shown also in the bottom row in A and C is the corresponding DIC micrograph. Bars = 10 μm.

(B) and (D) Representative micrographs of dark-grown *N. tabacum* BY-2 cells transiently co-expressing (via biolistic bombardment) *Arabidopsis* RidA-GFP or Thr Dht-GFP and BCAT3-mCherry. GFP and mCherry fluorescence (as indicated by panel labels) were observed by epifluorescence microscopy. Note that both sets of fusion proteins co-localized exclusively in plastids (i.e., leucoplasts), including stromules (refer to arrowheads in B and D), which are commonly observed in BY-2 cells (Simpson et al., 2008; Schattat et al., 2012). DIC micrographs are shown for each set of images. Bars = 10 μm.

Schattat, M.H., Griffiths, S., Mathur, N., Barton, K., Wozny, M.R., Dunn, N., Greenwood, J.S., and Mathur, J. (2012). Differential coloring reveals that plastids do not form networks for exchanging macromolecules. *Plant Cell* **24**: 1465–1477.

Simpson, J.P., Di Leo, R., Dhanoa, P.K., Allan, W.L., Makhmoudova, A., Clark, S.M., Hoover, G.J., Mullen, R.T., and Shelp, B.J. (2008). Identification and characterization of a plastid-localized *Arabidopsis* glyoxylate reductase isoform: comparison with a cytosolic isoform and implications for cellular redox homeostasis and aldehyde detoxification. *J. Exp. Bot.* **59**: 2545–2554.

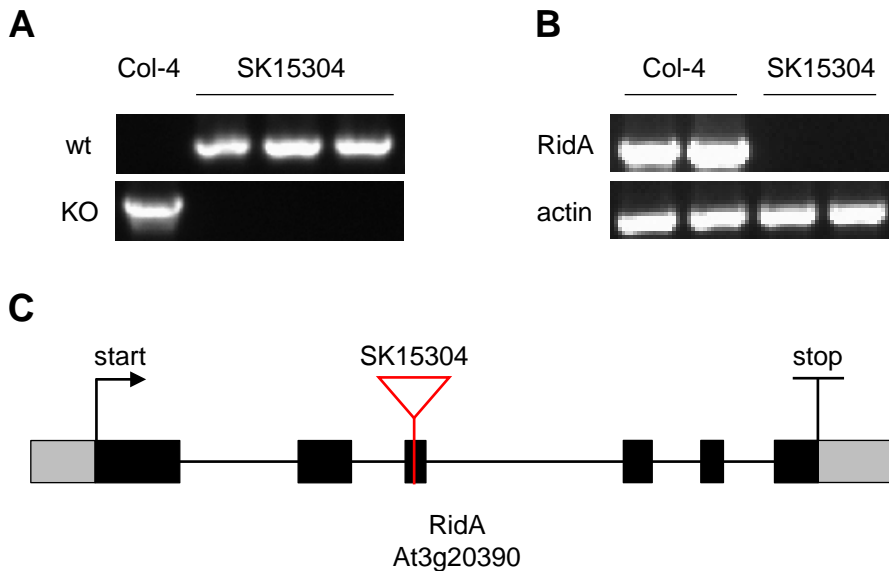

**Supplemental Figure 4.** Confirmation That the *Arabidopsis* *RidA* T-DNA Insertion Line Is a Knockout.

**(A)** Genotyping the SK15304 line. Genomic DNA from SK15304 plants or the corresponding wild-type, Columbia-4 (Col-4) was used as template for PCR reactions with wild-type allele primers (wt, primers 37 and 38) or T-DNA insertion allele primers (KO, primers 38 and 39). Amplicons were analyzed by agarose gel electrophoresis.

**(B)** Testing for the presence of the *RidA* transcript. Total RNA was used for first-strand cDNA synthesis, followed by PCR with primers designed to amplify the coding sequence of the *RidA* transcript (primers 40 and 41) or a fragment of the actin-7 transcript (primers 42 and 43). Amplicons were analyzed by agarose gel electrophoresis.

**(C)** T-DNA insertion site in the *RidA* gene. The PCR amplicon obtained with the T-DNA insertion allele primers in A above was cloned and sequenced. The gene model is drawn to scale with exons as black boxes, introns as black lines, and 5'- and 3'-UTRs as gray boxes. The T-DNA insertion site in exon 3 is indicated in red. The start and stop codons are indicated.

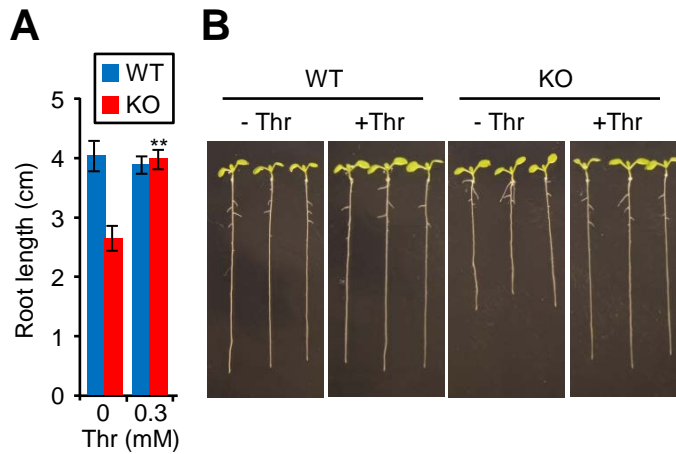

**Supplemental Figure 5.** Restoration by Thr of Root Growth of the *Arabidopsis* RidA Knockout.

(A) Root growth of Col-0 (WT) and the RidA knockout (KO) with or without 0.3 mM Thr after seven days on half-strength MS medium containing 1% sucrose. Data are means and SE for 6-12 replicate plants. For each strain, significant differences (Student's *t* test) from growth without Thr are asterisked: \*\*,  $P < 0.01$ .

(B) Images of WT and KO plants grown for seven days with or without 0.3 mM Thr.

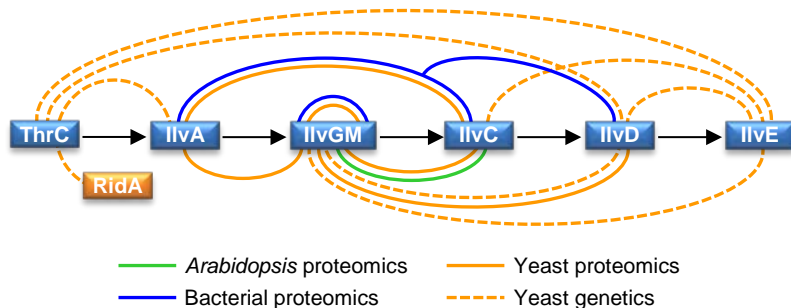

**Supplemental Figure 6.** Evidence for protein complex formation among enzymes of branched chain amino acid biosynthesis.

The enzymes are arranged in their order in the pathway and designated by their names in *E. coli*. IlvA, Thr dehydratase; IlvGM (representing also the homologs IlvBN, IlvIH), acetolactate synthase; IlvC, ketol-acid reductoisomerase; IlvD, dihydroxy-acid dehydratase; IlvE, branched-chain aminotransferase. Protein-protein interactions detected by proteomics approaches in *Saccharomyces cerevisiae*, various bacteria, or *Arabidopsis* are represented by solid arcs. Protein-protein interactions in *S. cerevisiae* that are inferred genetically (from synthetic lethality, phenotypic enhancement, or phenotypic suppression assays) are represented by dashed arcs. Intersecting arcs denote three-way interactions. No interactions were detected between the enzymes shown and those specific to Leu biosynthesis (LeuA, LeuB, LeuC, and LeuD). Data were collated from ATTED-II, STRING, and BioGRID databases. For simplicity, the two acetolactate synthase subunits (IlvG, IlvM) are treated as one unit.



**Supplemental Table 1.** RidA Family Proteins Used as Query Sequences to Search for Homologs in *Arabidopsis* and Maize

| Species                          | Gene name / Locus tag       | GenBank accession              |
|----------------------------------|-----------------------------|--------------------------------|
| <i>Salmonella enterica</i>       | <i>ridA</i> ( <i>yjgF</i> ) | <a href="#">AF095578.1</a>     |
| <i>Lawsonia intracellularis</i>  | LIC078                      | <a href="#">NC_008014.1</a>    |
| <i>Roseiflexus castenholzii</i>  | Rcas_2625                   | <a href="#">CP000804.1</a>     |
| <i>Polaribacter</i> sp. MED152   | MED152_12764                | <a href="#">CP004349.1</a>     |
| <i>Burkholderia xenovorans</i>   | Bxe_A1831                   | <a href="#">CP000270.1</a>     |
| <i>Saccharomyces cerevisiae</i>  | <i>HMF1</i> / YER057C       | <a href="#">NM_001178948.3</a> |
| <i>Meyerozyma guilliermondii</i> | PGUG_03922                  | <a href="#">XM_001484491.1</a> |
| <i>Debaryomyces hansenii</i>     | DEHA2G19558g                | <a href="#">XM_462393.1</a>    |
| <i>Kluyveromyces lactis</i>      | KLLA0B14817g                | <a href="#">XM_452191.1</a>    |
| <i>Kluyveromyces lactis</i>      | KLLA0E04005g                | <a href="#">XM_454124.1</a>    |
| <i>Botryotinia fuckeliana</i>    | BC1G_10083                  | <a href="#">XM_001551293.1</a> |

**Supplemental Table 2.** Predicted Localization of *Arabidopsis* and Maize RidA, Thr dehydratase, and BCAT Proteins

Targeting of full length *Arabidopsis* (At) and maize (GRMZM) RidA, Thr dehydratase (Thr DHT), and BCAT sequences was predicted using TargetP (<http://www.cbs.dtu.dk/services/TargetP/>), Predotar (<http://urgi.versailles.inra.fr/predotar/predotar.html>) and WoLF PSORT (<http://wolfpsort.seq.cbrc.jp/>). Predicted locations: P, plastids; M, mitochondria. Weak predictions are in parentheses; dashes indicate that the algorithm predicted no organellar targeting. The N-terminal region of the GRMZM2G569855 protein, which was missing from the sequence at MaizeSequence.org, was deduced from ESTs.

| Protein                 | TargetP | Predotar | WoLF PSORT |
|-------------------------|---------|----------|------------|
| At3g20390 (RidA)        | P       | P        | P (M)      |
| At3g10050 (Thr DHT)     | P       | (P)      | P          |
| At3g49680 (BCAT3)       | P       | P        | P (M)      |
| GRMZM2G117642 (RidA)    | P       | P        | P          |
| GRMZM2G155323 (Thr DHT) | P       | P        | P          |
| GRMZM2G569855 (Thr DHT) | P       | P        | P          |
| GRMZM2G071208 (BCAT)    | P       | --       | P (M)      |
| GRMZM2G055899 (BCAT)    | M (P)   | --       | P (M)      |

**Supplemental Table 3.** Targeted Metabolomics Analysis of Relative Levels of Thr, Ser, Branched-chain Amino Acids, and 2-Oxo Acids in *RidA* Knockout and Wild Type *Arabidopsis* Leaves

| Metabolite               | -Fold change<br>(Knockout/wild type) | P value  |
|--------------------------|--------------------------------------|----------|
| Thr                      | 1.1                                  | 0.45     |
| 2-Oxobutanoate           | 1.3                                  | 0.001*** |
| Ser                      | 1.0                                  | 0.75     |
| Pyruvate                 | 1.0                                  | 0.88     |
| Ile                      | 1.1                                  | 0.34     |
| 3-Methyl-2-oxopentanoate | 1.0                                  | 0.44     |
| Leu                      | 1.1                                  | 0.37     |
| 4-Methyl-2-oxopentanoate | 1.0                                  | 0.88     |
| Val                      | 1.0                                  | 0.78     |
| 2-Oxoisovalerate         | 1.0                                  | 0.88     |

Leaves were from three week-old plants. Data are means of six biological replicates, normalized to C10 (oxo acids) or C14 (amino acids) fatty acid methyl esters.

**Supplemental Table 4.** Oligonucleotide Primers Used in This Study

| Primer                            | Name                 | Sequence                                                            |
|-----------------------------------|----------------------|---------------------------------------------------------------------|
| <b>Functional complementation</b> |                      |                                                                     |
| 1                                 | At RidA NcoI F       | catgccatggctgtctctgcttctctgtga                                      |
| 2                                 | At RidA XbaI R       | ctagtctagactagagtgtgcaatacattcaa                                    |
| 3                                 | Zm RidA NcoI F       | catgccatggcgacctctgccaccgctg                                        |
| 4                                 | Zmt RidA XbaI R      | ctagtctagattagagagcagcgatgcact                                      |
| 5                                 | At R165A F           | cccagctccttctccagcagcatcgacgtatcaagttgc                             |
| 6                                 | At R165A R           | gcaacttgatacgtcgtatgctgctggagaaggagctggg                            |
| 7                                 | Zm R157A F           | cccggtgccagcacctcgagcatcaacctaccaagtggcg                            |
| 8                                 | Zm R157A R           | cgccactggttaggtgatgctgcagggtgctggcaccggg                            |
| <b>Protein expression</b>         |                      |                                                                     |
| 9                                 | At RidA NcoI F       | actgaccatggctgtctctgcttct                                           |
| 10                                | At RidA XhoI R       | gtcagtctcgaggagtgtgcaatacattcaatct                                  |
| 11                                | Zm RidA NcoI F       | actgaccatggcgacctctgccac                                            |
| 12                                | Zm RidA XhoI R       | gtcagtctcgaggagagcagcgatgcactcaa                                    |
| 13                                | Se RidA NcoI F       | catgccatggctatgagcaaaactattgcgacgg                                  |
| 14                                | Se RidA XhoI R       | tccgctcgaggcgacgaacagcgatcgctcaatc                                  |
| 15                                | Thr DHT NcoI F       | catgccatggctcttcttaccacgtcttaaggtc                                  |
| 16                                | Thr DHT NotI R       | ataagaatgcgccgctgcatcagaagcttaaaatagctg                             |
| 17                                | BCAT3 NdeI F         | gggaattccataggtgttctgccaattctccagtagc                               |
| 18                                | BCAT3 XhoI R         | ccgctcgagttaactaagattcacagtccatttc                                  |
| <b>Chloroplast import</b>         |                      |                                                                     |
| 19                                | At RidA-FL EcoRI F   | ggaattcaccatgacttggtcggtttcagatcc                                   |
| 20                                | At RidA-FL HindIII R | gccaagcttctagagtgtgcaatacattcaatc                                   |
| 21                                | At RidA-T EcoRI F    | ggaattcaccatggctgtctctgcttctctg                                     |
| 22                                | Zm RidA-FL EcoRI F   | ggaattcaccatggcgtggagcgcgccgccgctg                                  |
| 23                                | Zm RidA-FL HindIII R | gccaagctttagagagcagcgatgcactcaatc                                   |
| 24                                | Zm RidA-T EcoRI F    | ggaattcaccatggcgacctctgccaccgc                                      |
| 25                                | Thr DHT-FL XmaI F    | tccccccgggaccatgaattccggtcagctccgacg                                |
| 26                                | Thr DHT-FL XbaI R    | gctctagatcagtgcatcagaagcttaaaatag                                   |
| 27                                | Thr DHT-T EcoRI F    | ggaattcaccatggagtatttgacgaataac                                     |
| <b>GFP fusions</b>                |                      |                                                                     |
| 28                                | At RidA XmaI F       | tccccccggggaaggagatagaacctgacttggtcggtttcagatcc                     |
| 29                                | At RidA NheI R       | ttctagctagcagagtgtgcaatacattcaatctcg                                |
| 30                                | Thr DHT XmaI F       | tccccccggggaaggagatagaacctgaattccggtcagctccgacg                     |
| 31                                | Thr DHT NheI R       | ttctagctagcgtgcatcagaagcttaaaatagctg                                |
| 32                                | BCAT3 XmaI F         | tccccccggggaaggagatagaacctggagagagcagcaattctcc                      |
| 33                                | BCAT3 NheI R         | ttctagctagcactaagattcacagtccatttcag                                 |
| 34                                | At RidA Gw F         | ggggacaagttgtacaaaaaagcaggcttcgaaggagatagaacctgacttggtcggtttcagatcc |
| 35                                | Thr DHT Gw F         | ggggacaagttgtacaaaaaagcaggcttcgaaggagatagaacctgaattccggtcagctccgacg |
| 36                                | mGFP Gw R            | ggggaccactttgtacaaagctgggtcttactgtacagctcgctccatgccc                |
| <b>Arabidopsis knockouts</b>      |                      |                                                                     |
| 37                                | SK15304 LP           | ggcaaagctgcaactgatac                                                |
| 38                                | SK15304 RP           | aattttctccaatttgaccg                                                |
| 39                                | SK LB1               | ttctcatctaagccccattgg                                               |
| 40                                | RidA F               | atgacttggtcggtttcagatcc                                             |
| 41                                | RidA R               | ctagagtgtgcaatacattcaatc                                            |
| 42                                | actin-7 F            | atggccgatggtgaggat                                                  |
| 43                                | actin-7 R            | gtctcaaacatgatctgagtc                                               |
